# Supplementary material
Source: ML conference proceedings conference paper supplement (https://aclanthology.org/D19-1545)
Supplement: Attachment [file final_supp_mat.pdf › final_supp_mat.pdf]

## Supplementary Materials

Srinivasan Iyer<sup>†</sup>, Alvin Cheung<sup>§</sup> and Luke Zettlemoyer<sup>†‡</sup>

<sup>†</sup>Paul G. Allen School of Computer Science and Engineering, Univ. of Washington, Seattle, WA  
{sviyer, lsz}@cs.washington.edu

<sup>§</sup>Department of Electrical Engineering and Computer Sciences, UC Berkeley, Berkeley, CA  
akcheung@cs.berkeley.edu

<sup>‡</sup> Facebook AI Research, Seattle  
lsz@fb.com

### 1 Iyer-Simp for CONCODE

Iyer-Simp is similar to the best performing encoder-decoder model of Iyer et al. (2018) on the CONCODE dataset, with three major modifications in their encoder, which yields improvements in speed and accuracy. First, in addition to camel-case splitting of identifier tokens, we use byte-pair encoding (BPE) (Sennrich et al., 2016) on all NL tokens, identifier names and types and embed these BPE tokens using a single embedding matrix. Next, we replace their RNN that contextualizes the subtokens of identifiers and types with an average of the subtoken embeddings instead. Finally, we consolidate their three separate RNNs for contextualizing NL, variable names with types, and method names with types, into a single shared RNN, which greatly cuts down model parameters. We present the full model here for convenience. Since the decoder is unmodified, large portions of this section are borrowed from Iyer et al. (2018).

Formally, let  $\{q_i\}$  represent the set of BPE tokens of the NL, and  $\{t_{ij}\}$ ,  $\{v_{ij}\}$ ,  $\{r_{ij}\}$  and  $\{m_{ij}\}$  represent the  $j$ th BPE token of the  $i$ th variable type, variable name, method return type, and method name respectively.

**Encoder** The encoder computes contextual representations of the NL and each component in the context. First, all the elements defined above are embedded using a BPE token embedding matrix  $B$  to give us  $\mathbf{q}_i$ ,  $\mathbf{t}_{ij}$ ,  $\mathbf{v}_{ij}$ ,  $\mathbf{r}_{ij}$  and  $\mathbf{m}_{ij}$ . Using Bi-LSTM  $f$ , the encoder then computes:

$$h_1, \dots, h_z = f(\mathbf{q}_1, \dots, \mathbf{q}_z) \quad (1)$$

$$\mathbf{v}_i = Avg(\mathbf{v}_{i1}, \dots, \mathbf{v}_{ij}) \quad (2)$$

$$\text{Similarly, compute } \mathbf{m}_i, \mathbf{t}_i, \mathbf{r}_i \quad (3)$$

$$\hat{t}_i, \hat{v}_i = f(\mathbf{t}_i, \mathbf{v}_i) \quad (4)$$

$$\hat{r}_i, \hat{m}_i = f(\mathbf{r}_i, \mathbf{m}_i) \quad (5)$$

Then,  $h_1, \dots, h_z$ , and  $\hat{t}_i, \hat{v}_i, \hat{r}_i, \hat{m}_i$  are passed to the attention mechanism in the decoder.

**Decoder** The decoder is a sequential LSTM based model that produces a sequence of grammar rules ( $a_t$  at step  $t$ ), which can later be put together to form a source code snippet. At each time step  $t$ , the decoder expands a non-terminal that was produced earlier, by choosing a valid right hand side rule for that non-terminal. The first non-terminal (at step 1) is *MemberDeclaration* and subsequently, every non-terminal is expanded in a depth first left to right fashion, similar to Yin and Neubig (2017). The probability of a source code snippet is decomposed as a product of the conditional probability of generating each step in the sequence of rules conditioned on the previously generated rules.

More specifically, the decoder is an LSTM-based RNN with hidden dimension size  $H$ , that produces a context vector  $c_t$  at each time step, which is used to compute a distribution over next actions.

$$p(a_t | a_{<t}) \propto \exp(W^{n_t} c_t) \quad (6)$$

Here,  $W^{n_t}$  is a  $|n_t| \times H$  matrix, where  $|n_t|$  is the total number of unique grammar rules that  $n_t$  can be expanded to. The context vector  $c_t$  is computed using the hidden state  $s_t$  of an n-layer decoder LSTM cell and attention vectors over the NL and the context ( $z_t$  and  $e_t$ ), as described below.

**Decoder LSTM** The decoder uses an n-layer LSTM whose hidden state  $s_t$  is computed based on the current non-terminal  $n_t$  to be expanded, the previous production rule  $a_{t-1}$ , the parent production rule,  $\text{par}(n_t)$ , that produced  $n_t$ , the previous decoder LSTM state  $s_{t-1}$ , and the decoder state of the LSTM cell that produced  $n_t$ , denoted as  $s_{n_t}$ .

$$s_t = \text{LSTM}(n_t, a_{t-1}, \text{par}(n_t), s_{t-1}, s_{n_t}) \quad (7)$$

We use an embedding matrix  $N$  to embed  $n_t$  and matrix  $A$  to embed  $a_{t-1}$  and  $\text{par}(n_t)$ . If  $a_{t-1}$  is a rule that generates a terminal node that represents an identifier or literal, it is represented using a special rule *IdentifierOrLiteral* to collapse all these rules into a single previous rule.

**Two-step Attention** At time step  $t$ , the decoder first attends to every token in the NL representation,  $h_i$ , using the current decoder state,  $s_t$ , to compute a set of attention weights  $\alpha_t$ , which are used to combine  $h_i$  into an NL context vector  $z_t$ . We use a general attention mechanism (Luong et al., 2015), extended to perform multiple steps.

$$\alpha_{t,i} = \frac{\exp(s_t^T \mathbf{F} h_i)}{\sum_i \exp(s_t^T \mathbf{F} h_i)}$$

$$z_t = \sum_i \alpha_{t,i} h_i$$

The context vector  $z_t$  is used to attend over every type (return type) and variable (method) name in the environment, to produce attention weights  $\beta_t$  that are used to combine the entire context  $x = [t : v : r : m]$  into an environment context vector  $e_t$ .<sup>1</sup>

$$\beta_{t,j} = \frac{\exp(z_t^T \mathbf{G} x_j)}{\sum_j \exp(z_t^T \mathbf{G} x_j)}$$

$$e_t = \sum_j \beta_{t,j} x_j$$

Finally,  $c_t$  is computed using the decoder state and both context vectors  $z_t$  and  $e_t$ :

$$c_t = \tanh(\hat{W}[s_t : z_t : e_t])$$

**Supervised Copy Mechanism** Since the class environment at test time can belong to previously unseen new domains, our model needs to learn to copy variables and methods into the output. We use the copying technique of Gu et al. (2016) to compute a copy probability at every time step  $t$  using learned vector  $b$  of dimensionality  $H$ .

$$\text{copy}(t) = \sigma(b^T c_t)$$

Since we only require named identifiers or user defined types to be copied, both of which are produced by production rules with  $n_t$  as *IdentifierNT*, we make use of this copy mechanism only in this case. Identifiers can be generated by directly generating derivation rules (see equation 6),

<sup>1</sup>“:” denotes concatenation.

or by copying from the environment. The probability of copying an environment token  $x_j$ , is set to be the attention weights  $\beta_{t,j}$  computed earlier, which attends exactly on the environment types and names which we wish to be able to copy. The copying process is supervised by preprocessing the grammar rules to recognize identifiers that can be copied from the environment, and both the generation and the copy probabilities are weighted by  $1 - \text{copy}(t)$  and  $\text{copy}(t)$  respectively.

**Hyperparameters and Inference** We use an embedding size  $H$  of 1024 for identifiers and types. All LSTM cells use 2-layers and a hidden dimensionality of 1024 (512 on each direction for BiLSTMs). We use an embedding size of 512 for encoding non-terminals and rules in the decoder. We use dropout with  $p = 0.5$  in between LSTM layers and at the output of the decoder over  $c_t$ . We train our model for 30 epochs using mini-batch gradient descent with a batch size of 40, and we use Adam (Kingma and Ba, 2015) with an initial learning rate of 0.001 for optimization. We decay our learning rate by 80% based on performance on the development set after every epoch. We use beam search with a beam size of 5 for decoding the sequence of grammar rules at test time.

## 2 Seq2Prod for ATIS-SQL

Our Seq2Prod is similar to the Seq2Prod model of Iyer et al. (2018), with a modification in the inputs to the decoder LSTM. We describe the entire model here for convenience. Large portions of this section are borrowed from Iyer et al. (2018).

**Encoder** The encoder of Seq2Prod computes contextual representations of the NL query. Note that unlike the previous model for CONCODE, this model does not need to encode context. If  $q_i$  represents each lemmatized token of the NL, they are first embedded using a token embedding matrix  $B$  to give us  $\mathbf{q}_i$ . Using Bi-LSTM  $f$ , the encoder then computes:

$$h_1, \dots, h_z = f(\mathbf{q}_1, \dots, \mathbf{q}_z) \quad (8)$$

Then,  $h_1, \dots, h_z$  are passed to the attention mechanism in the decoder.

**Decoder** Similar to the Iyer-Simp model described above, the decoder is a sequential LSTM based model that produces a sequence of grammar rules ( $a_t$  at step  $t$ ), which can later be put together

to form a source code snippet. More specifically, the decoder is an LSTM-based RNN with hidden dimension size  $H$ , that produces a context vector  $c_t$  at each time step, which is used to compute a distribution over next actions.

$$p(a_t|a_{<t}) \propto \exp(W^{n_t}c_t) \quad (9)$$

Here,  $W^{n_t}$  is a  $|n_t| \times H$  matrix, where  $|n_t|$  is the total number of unique grammar rules that  $n_t$  can be expanded to. The context vector  $c_t$  is computed using the hidden state  $s_t$  of an n-layer decoder LSTM cell and attention vectors over the NL  $z_t$ , as described below.

**Decoder LSTM** The decoder uses an n-layer LSTM ( $\text{LSTM}_f$ ) whose hidden state at time  $t$ ,  $s_t$ , is computed based on an embedding of the current non-terminal  $n_t$  to be expanded, a contextualized embedding of the previous production rule  $a_{t-1}$ , a contextualized embedding of the parent production rule,  $\text{par}(n_t)$ , that produced  $n_t$ , and the previous decoder LSTM state  $s_{t-1}$ . Note that unlike the previous Iyer-Simp model, we do not use the parent LSTM state as it does not provide any improved performance.

We use an embedding matrix  $N$  to embed  $n_t$ . To compute the contextualized embeddings of  $a_{t-1}$  and  $\text{par}(n_t)$  in  $\text{LSTM}_f$ , we use another single layer Bi-LSTM ( $\text{LSTM}_g$ ) across the left and right sides of the rule (using separator symbol SEP) and use the final hidden state as inputs to  $\text{LSTM}_f$  instead. More concretely, if a grammar rule is represented as  $A \rightarrow B_1 \dots B_n$ , then:

$$\begin{aligned} \text{Emb}(A \rightarrow B_1 \dots B_n) = \\ \text{LSTM}_g(\{A, \text{SEP}, B_1, \dots, B_n\}) \end{aligned} \quad (10)$$

$$s_t = \text{LSTM}_f(n_t, \text{Emb}(a_{t-1}), \text{Emb}(\text{par}(n_t)), s_{t-1}) \quad (11)$$

The contextualization of these rule embeddings is the primary difference between our model and Iyer et al. (2018). This modification can help the  $\text{LSTM}_f$  cell locate the position of  $n_t$  within rules  $a_{t-1}$  and  $\text{par}(n_t)$ , especially, for lengthy idiomatic rules.

$s_t$  is then used for attention and finally, produces a distribution over grammar rules.

**Single-Step Attention** At time step  $t$ , the decoder attends to every token in the NL representation,  $h_i$ , using the current decoder state,  $s_t$ , to

compute a set of attention weights  $\alpha_t$ , which are used to combine  $h_i$  into an NL context vector  $z_t$ . We use the general attention mechanism of Luong et al. (2015).

$$\begin{aligned} \alpha_{t,i} &= \frac{\exp(s_t^T F h_i)}{\sum_i \exp(s_t^T F h_i)} \\ z_t &= \sum_i \alpha_{t,i} h_i \end{aligned}$$

Finally,  $c_t$  is computed using the decoder state and context vector  $z_t$ :

$$c_t = \tanh(\hat{W}[s_t : z_t])$$

**Supervised Copy Mechanism** The supervised copy mechanism is exactly the same as described for the previous model (Iyer-Simp), using context vector  $c_t$ .

**Hyperparameters** We use an embedding size  $H$  of 1024 for NL query tokens. Both the encoder and decoder LSTM cells use 2-layers and a hidden dimensionality of 1024 (512 on each direction for BiLSTMs). We use an embedding size of 512 for encoding non-terminals and a hidden size of 256 for the contextualized rules (for  $\text{LSTM}_g$ ) in the decoder. We use dropout with  $p = 0.5$  in between LSTM layers and at the output of the decoder over  $c_t$ . We train our model for 60 epochs using mini-batch gradient descent with a batch size of 40, and we use Adam (Kingma and Ba, 2015) with an initial learning rate of 0.001 for optimization. We decay our learning rate by 80% based on performance on the development set after every epoch. We use beam search with a beam size of 5 for decoding the sequence of grammar rules at test time.

## References

- Jiatao Gu, Zhengdong Lu, Hang Li, and Victor O.K. Li. 2016. [Incorporating copying mechanism in sequence-to-sequence learning](#). In *Proceedings of the 54th Annual Meeting of the Association for Computational Linguistics (Volume 1: Long Papers)*, pages 1631–1640, Berlin, Germany. Association for Computational Linguistics.
- Srinivasan Iyer, Ioannis Konstas, Alvin Cheung, and Luke Zettlemoyer. 2018. [Mapping language to code in programmatic context](#). In *Proceedings of the 2018 Conference on Empirical Methods in Natural Language Processing*, pages 1643–1652. Association for Computational Linguistics.
- Diederik Kingma and Jimmy Ba. 2015. Adam: A method for stochastic optimization. In *ICLR*.

Thang Luong, Hieu Pham, and D. Christopher Manning. 2015. [Effective approaches to attention-based neural machine translation](#). In *Proceedings of the 2015 Conference on Empirical Methods in Natural Language Processing*, pages 1412–1421. Association for Computational Linguistics.

Rico Sennrich, Barry Haddow, and Alexandra Birch. 2016. [Neural machine translation of rare words with subword units](#). In *Proceedings of the 54th Annual Meeting of the Association for Computational Linguistics (Volume 1: Long Papers)*, pages 1715–1725, Berlin, Germany. Association for Computational Linguistics.

Pengcheng Yin and Graham Neubig. 2017. [A syntactic neural model for general-purpose code generation](#). In *Proceedings of the 55th Annual Meeting of the Association for Computational Linguistics (Volume 1: Long Papers)*, pages 440–450, Vancouver, Canada. Association for Computational Linguistics.
